# Supplementary material
Source: PubMed Central journal article supplement (PMC2574563)

# Supplemental Figure 1

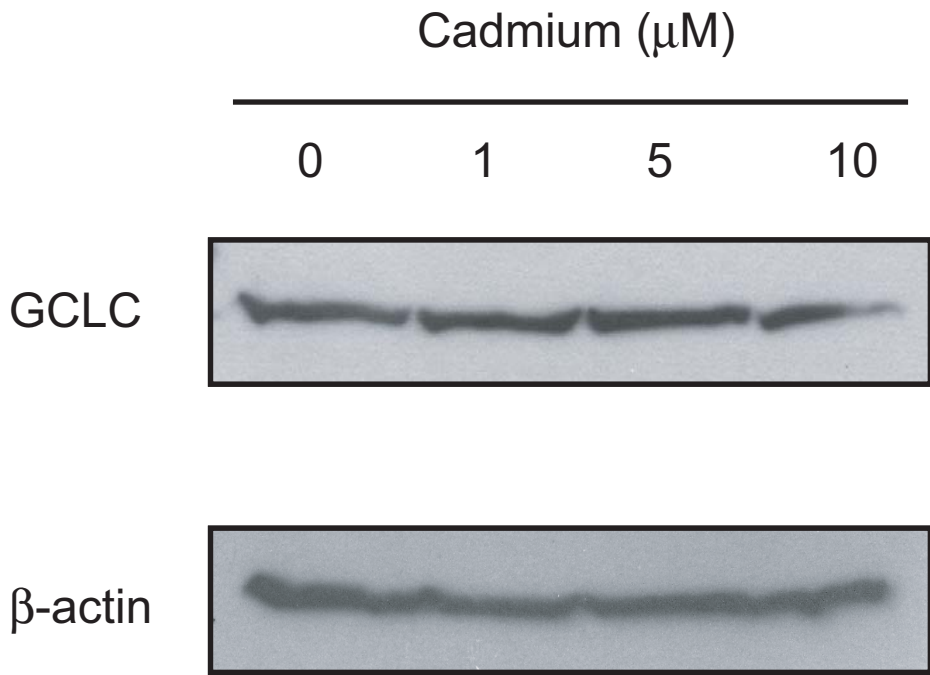

A

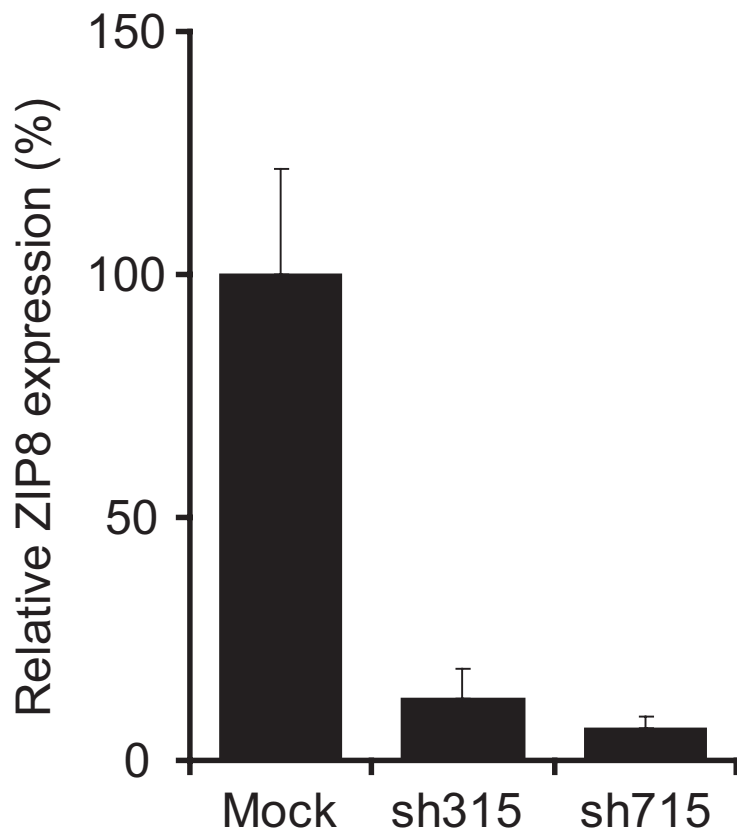

B

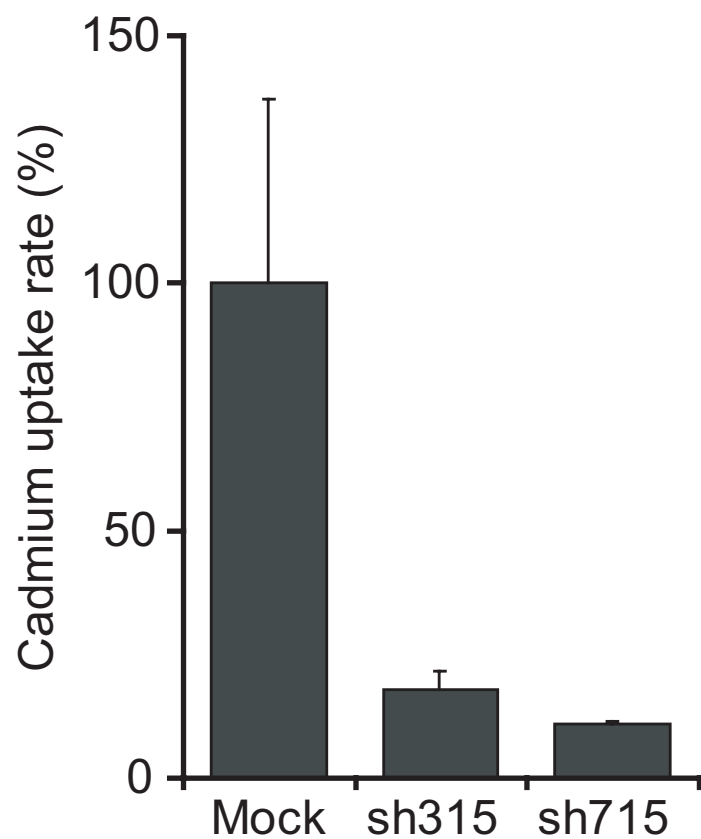

Supplement: NIHMS66141-supplement.pdf [file NIHMS66141-supplement.pdf]
